# Supplementary figures and images for: Weight-Bias Internalization and Eating-Disorder Psycho-Pathology in Treatment-Seeking Patients With Obesity
Source: Preprints.org preprint supplement (doi:10.20944/preprints202306.1411.v1), 2023-06-21

Bridge Expected Influence (1-step)

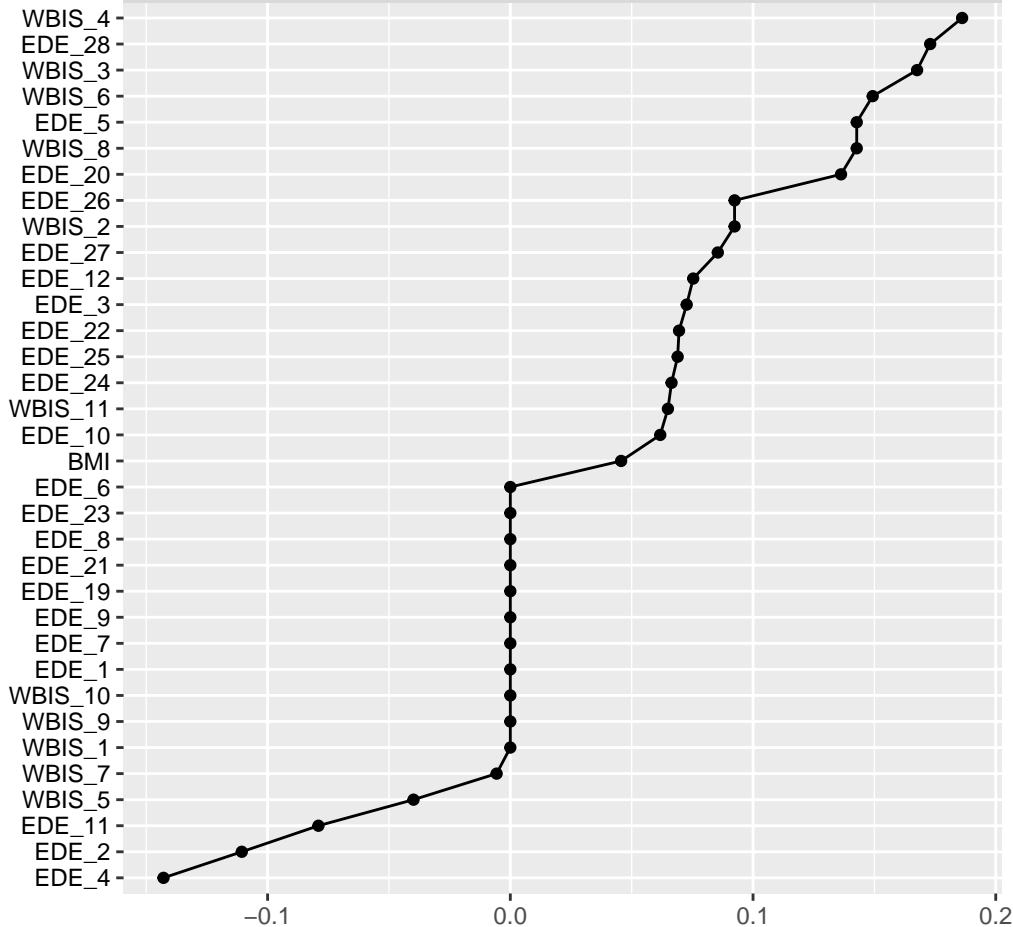

Supplement: Supplementary file 1 [file supplementary]

expectedInfluence

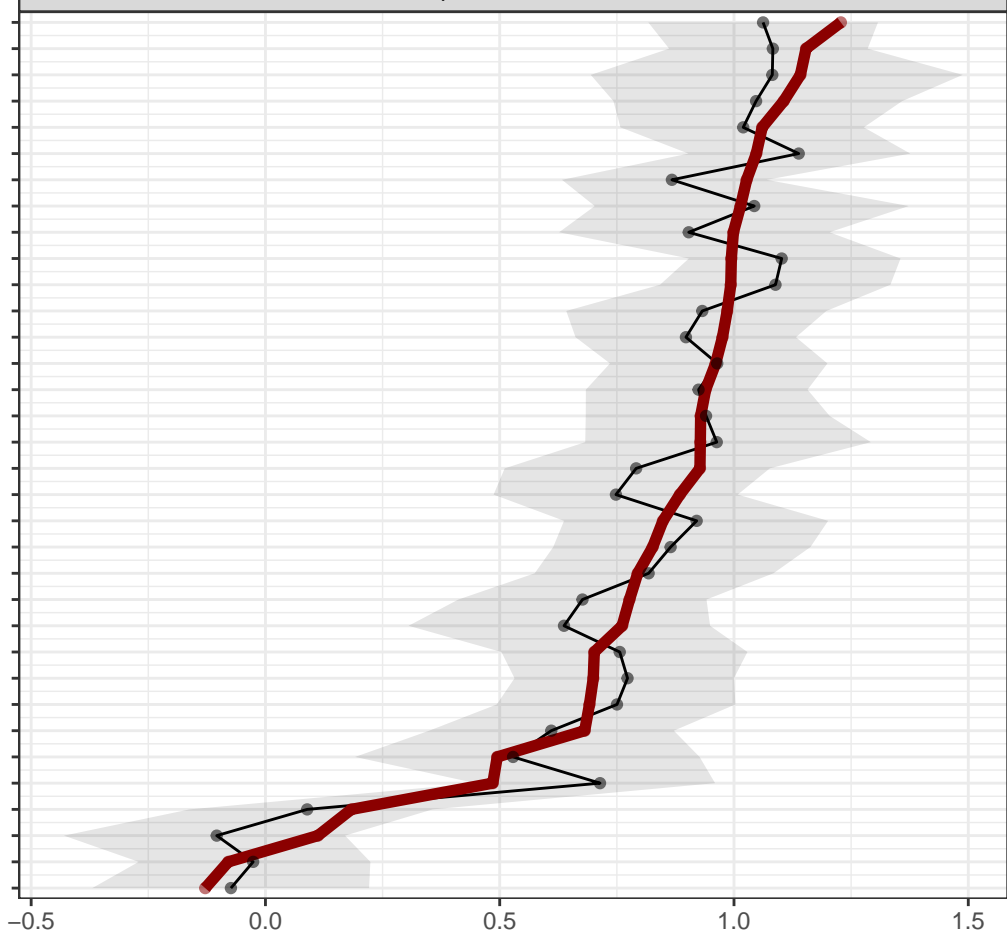

Supplement: Supplementary file 2 [file supplementary]

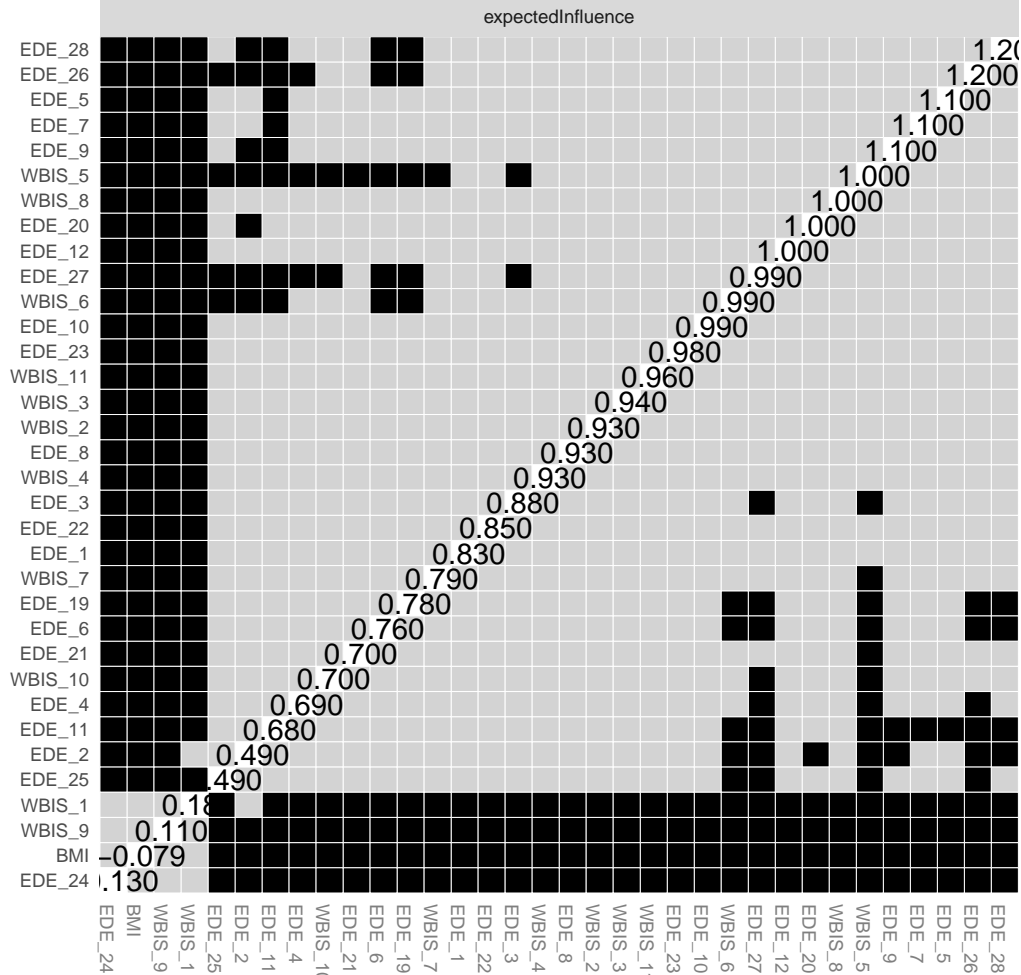

Supplement: Supplementary file 4 [file supplementary]

Average correlation with original sample

expectedInfluence

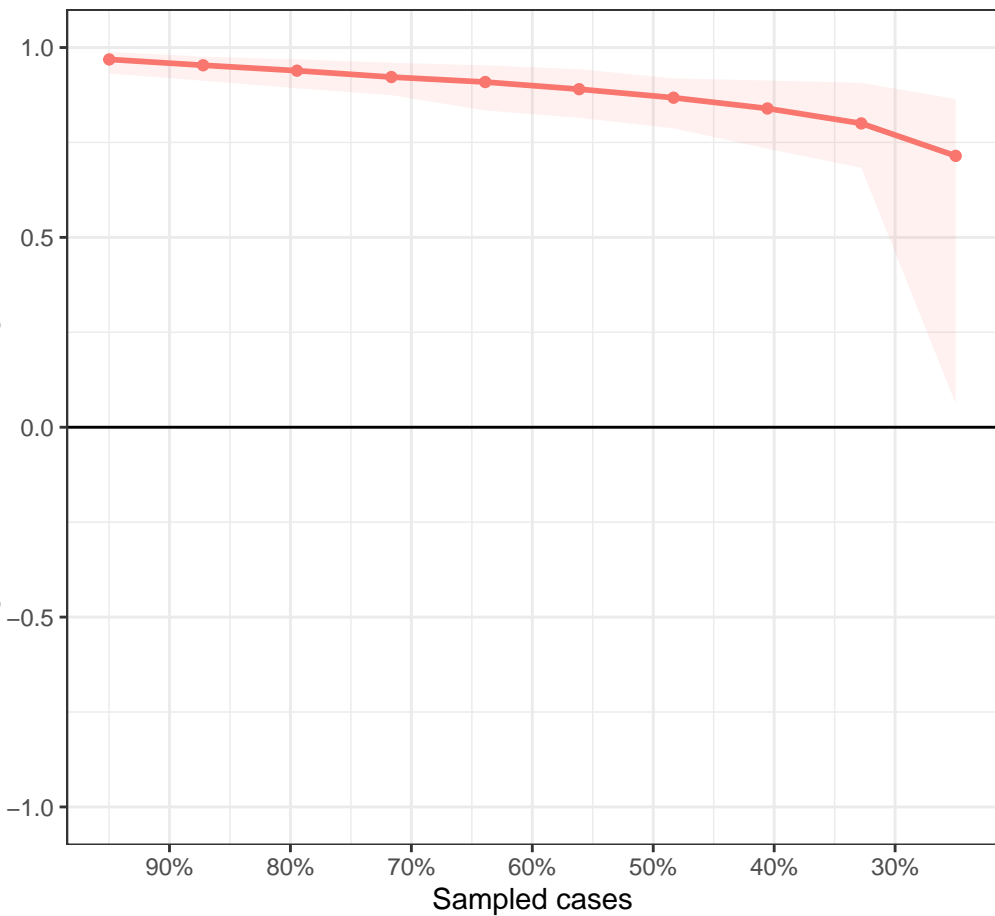

Supplement: Supplementary file 5 [file supplementary]

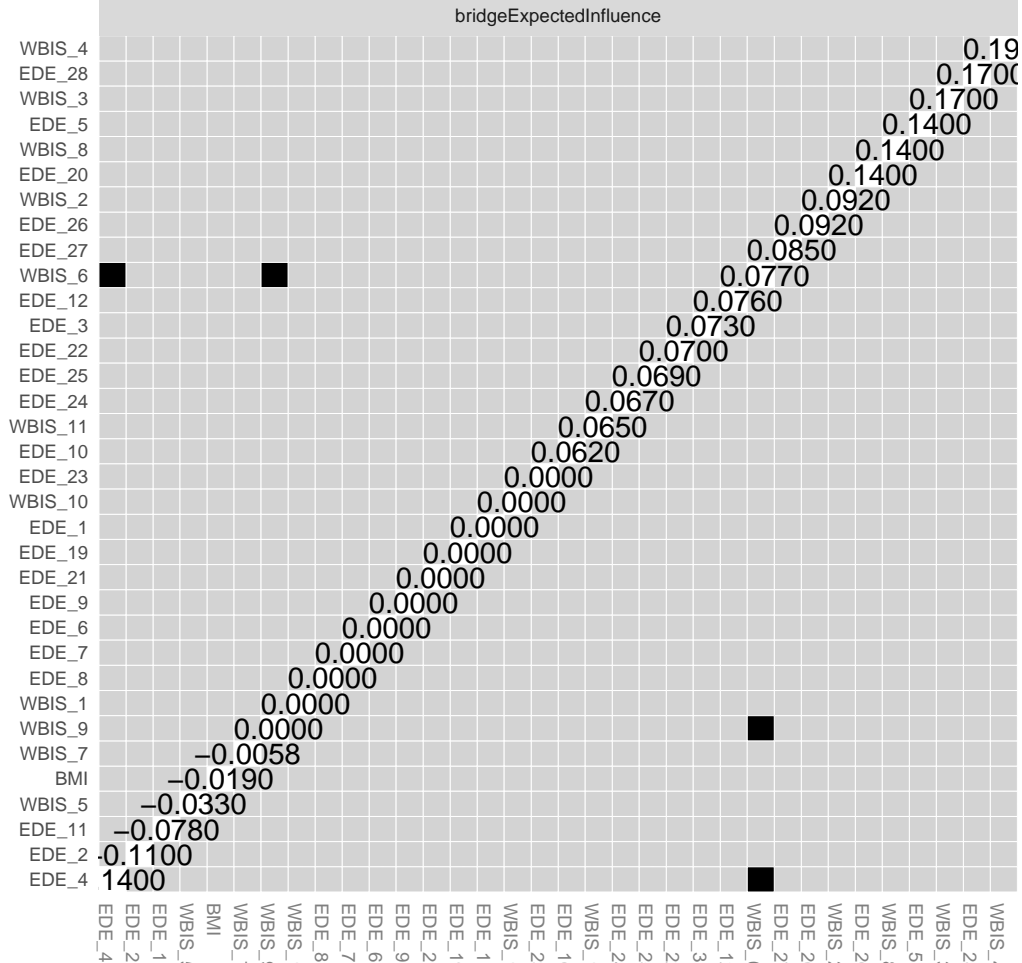

Supplement: Supplementary file 7 [file supplementary]
